# Supplementary material for: A context-dependent combination of Wnt receptors controls axis elongation and leg development in a short germ insect
Source: Oxford University Press journal article supplement (doi:10.1242/dev.063644), 2011-06-07
Supplement: dev063644figs4.pdf [file dev063644figs4.pdf]

## TM domain

### 5x the conserved PPP(S/T)Px(S/T) motif

Alignment Report of 'arrow-LRP alignTcDr#1497B14.meg' - ClustalW (Slow/Accurate, Gonnet)

|            |       |                                                                                     |                         |                                            |          |          |      |
|------------|-------|-------------------------------------------------------------------------------------|-------------------------|--------------------------------------------|----------|----------|------|
| Trib.cast. | Arrow | KCKDGCISLAHACDGIDHCADKSDEEACCR----DGFQCPNTQECLPANFVCDKIDHCADGSDEHPSHCNNASKLVSSNGVWV | IILGASGATMFISGI         | 1398                                       |          |          |      |
| Dros.mel.  | Arrow | SCQSGECIDKSLVCDGTTNCANGHDEADCKR--PGEFQCPINKLCISAALLCDGWENCADGADESSDCLQRRMAPATDKRAF  | LLIGATMITIFSIVY         | 1468                                       |          |          |      |
| Homo.sap.  | LRP5  | PCARGQCVDLRLRCDGEADCQDRSDEADCAICLPNQFRCAS-GQCVLIKQQCDSFPDCIDGSDELMCEITKPPSDDSPA     | HSSAIGPVIGIILSLFVMGG    | 1402                                       |          |          |      |
| Homo.sap.  | LRP6  | QCASGQCIDGALRCNGDANCQDKSDEKNCEVLCLIDQFRCAN-GQCIGKHKKCDHNVDCSDKSDELDCYPTEEP---       | APQATNTVGSVIGVIVTIFVSGT | 1389                                       |          |          |      |
| Trib.cast. | Arrow | LVYLLKRRS----SDDLNDQSEDSLS-----P--MQPKPHIKIRKGI PDVVRMSMTG--SETS                    | YDRNHITGASSS-TNESSLT    | CYPREPLNP                                  | 1477     |          |      |
| Dros.mel.  | Arrow | LLQFCRTRIGKSRTEPKDDQATDPLS-----PSTLSKSQRVSKIASVADAVRMSTLNSRNSMNSYDRNHITGASS         | STNGSSMVAYP---INP       | 1553                                       |          |          |      |
| Homo.sap.  | LRP5  | VYFVQRVVCQRYAGANGPFPHEYVS-GTPHVPLNFIAPGGSQHGPFTGIACGKSMSSVSLMGGRGGVPLYDRNHVT        | GASSSSSSSTKATLYP-PILNP  | 1500                                       |          |          |      |
| Homo.sap.  | LRP6  | VYFICQRMLCPRMKGDGETMTNDYVHGPASVPLGYVPHPSSLSGSLPGMSRKGKSMISSLSIMGGSSGPP-YDRAHVT      | GASSSSSSSTKGTYP-AILNP   | 1487                                       |          |          |      |
| Trib.cast. | Arrow | PPSPATTRGSS-----P--SSRYR--PYRHYSINQP                                                | PPPTPCST                | DVCDESDCNYPTRSR-----YDAGFP                 | PPPTPRSH | 1543     |      |
| Dros.mel.  | Arrow | PPSPATRSR-----R--PYRHYKIINQP                                                        | PPPTPCST                | DICDESDSNYTSKSNNSNGGATKHSSSSAAACLQYGYDSEYP | PPPTPRSH | 1635     |      |
| Homo.sap.  | LRP5  | PPSPATDPSLYNMDMFYSSNIPATAR--PYRPYIIRGMA                                             | PPTTPCST                | DVCDS---DYSASR-----WKASKYYLDLNSDSDPYP      | PPPTPHSQ | 1582     |      |
| Homo.sap.  | LRP6  | PPSPATERSHYTMEFGYSSNSPSTHRSYSYRPYSYRHFA                                             | PPTTPCST                | DVCDS---DYAPSRRMTSV-----ATAKGYTSDLNYDSEVP  | PPPTPRSQ | 1576     |      |
| Trib.cast. | Arrow | CHS-----ESC                                                                         | PPSPSS                  | RSSTYFNPLP                                 | PPSPVA   | SPPRGYDS | 1580 |
| Dros.mel.  | Arrow | YHSDVRIVPESSC                                                                       | PPSPSS                  | RSSTYFSPLP                                 | PPSPVQ   | SPSRGFT  | 1678 |
| Homo.sap.  | LRP5  | YLSAED-----SC                                                                       | PPSPAT                  | ERSY-FHLFP                                 | PPSPCT   | DSS      | 1615 |
| Homo.sap.  | LRP6  | YLSAEENY--ESC                                                                       | PPSPYT                  | ERSYSHHLYP                                 | PPSPCT   | DSS      | 161  |
