# Supplementary material for: A context-dependent combination of Wnt receptors controls axis elongation and leg development in a short germ insect
Source: Oxford University Press journal article supplement (doi:10.1242/dev.063644), 2011-06-07
Supplement: dev063644tables1.pdf [file dev063644tables1.pdf]

**Table S1. Larval cuticles: Numerical analysis of RNAi phenotypes****A. Summary. Pooled results originate from separate injection experiments using different dsRNA-concentrations (in red: concentrations used)**

|                                                                   | <i>Fz1/2</i><br>300 ng/μl / 1500<br>ng/μl | <i>Fz1</i><br><1000 ng/μl /<br>1500 ng/μl | <i>Fz1/4</i>     | <i>Fz4</i> | <i>arrow</i> | water     |
|-------------------------------------------------------------------|-------------------------------------------|-------------------------------------------|------------------|------------|--------------|-----------|
| Total <i>n</i>                                                    | 372 / 389                                 | 383 / 69                                  | 943              | 396        | 3290         | 130       |
| Percentage of specific phenotypes ( <i>n</i> )                    | 72.5% (270)<br>43% (167)                  | 29% (112)<br>29% (20)                     | 57% (538)        | 2.5% (10)  | 10.5% (347)  | – *       |
| Percentage of empty eggs ( <i>n</i> )                             | 17.5% (65)<br>54.2% (211)                 | 12% (45)<br>45% (31)                      | 13% (121)        | 8.5% (34)  | 74% (2431)   | 6% (8)    |
| Percentage of wild type ( <i>n</i> )                              | 10% (37)<br>2.8% (11)                     | 59% (226)<br>26% (18)                     | 30% (284)        | 89% (352)  | 15.5% (512)  | 94% (122) |
| Number of phenotypes =100%                                        | 270 / 167                                 | 112 / 20                                  | 538              | 10         | 347          | –         |
| Percentage of phenotypes classed as medium strength ( <i>n</i> )  | 97% (262)<br>7.8% (13)                    | 100% (112)<br>100% 20                     | 98% (529)        | 50% (5)    | 43% (150)    | –         |
| Percentage of phenotypes classed as strong (spheres) ( <i>n</i> ) | 3% (8)<br>92.2% (154)                     | –                                         | 2% (9)           | 50% (5)    | 57% (197)    | –         |
| Number of app.–/gut–phenotypes ( <i>n</i> ) =100%                 | –                                         | 112 / 20                                  | 529 <sup>†</sup> | 5          | –            | –         |
| Percentage of app.– only phenotypes ( <i>n</i> )                  | –                                         | 97% (109)<br>100% (20)                    | 13% (67)         | 100% (5)   | –            | –         |
| Percentage of app. and gut phenotypes ( <i>n</i> )                | –                                         | 3% (3) –                                  | 87% (462)        | –          | –            | –         |

app., appendages.

\*3% (*n*=4). Unspecific phenotype: flagellum of the antenna missing, but as this can be caused during the embedding procedure it is counted as wild type.<sup>†</sup>For the comparison of fz1-fz1/4-fz4 RNAi, double stranded RNA of the same concentration was used in the single and the double RNAi experiments.

**BRNAi experiments: injection series sorted by different dsRNA concentrations used****B1. Tc-fz1-RNA**

|                                                                   | <i>Fz1</i>  | <i>Fz1</i> | <i>Fz1</i> | <i>Fz1</i> |
|-------------------------------------------------------------------|-------------|------------|------------|------------|
| Concentration of dsRNA                                            | 300 ng/μl   | 650 ng/μl  | 1000 ng/μl | 1500 ng/μl |
| Total <i>n</i> analysed cuticles                                  | 177         | 51         | 155        | 69         |
| Percentage of specific phenotypes ( <i>n</i> )                    | 13.6% (24)  | 62.7% (51) | 45.1% (70) | 29% (20)   |
| Percentage of empty eggs ( <i>n</i> )                             | 1.1% (2)    | 37.3% (19) | 15.5% (24) | 45% (31)   |
| Percentage of wild type ( <i>n</i> )                              | 85.3% (151) | –          | 39.4% (61) | 26% (18)   |
| Number of phenotypes =100%                                        | 24          | 51         | 70         | 20         |
| Percentage of phenotypes classed as medium strength ( <i>n</i> )  | 100% (24)   | 100% (51)  | 100% (70)  | 100%       |
| Percentage of phenotypes classed as strong (spheres) ( <i>n</i> ) | –           | –          | –          | –          |
| Number of app.–/gut–phenotypes ( <i>n</i> ) =100%                 | 24          | 51         | 70         | 20         |
| Percentage of app.–only phenotypes ( <i>n</i> )                   | 100% (24)   | 96% (49)   | 98.5% (69) | 100% (20)  |
| Percentage of app. and gut phenotypes ( <i>n</i> )                | –           | 4% (2)     | 1.5% (1)   | –          |

**B2. Tc-fz2 RNA**

|                                       | <i>fz2</i> | <i>fz2</i> |
|---------------------------------------|------------|------------|
| Concentration of dsRNA                | 300 ng/μl  | 1500 ng/μl |
| Total <i>n</i> analysed cuticles      | 26         | 56         |
| Percentage of empty eggs ( <i>n</i> ) | 50% (13)   | 19.6% (11) |
| Percentage of wild type ( <i>n</i> )  | 50% (13)   | 80.4% (45) |

**B3. Tc-fz1+Tc-fz2 double RNAi**

|                                                                   | <i>Fz1/2</i><br>(first injection series <sup>†</sup> ) | <i>Fz1/2</i> | <i>Fz1/2</i> |
|-------------------------------------------------------------------|--------------------------------------------------------|--------------|--------------|
| Concentration of dsRNA                                            | 300 ng/μl                                              | 300 ng/μl    | 1500 ng/μl   |
| Total <i>n</i> analysed cuticles                                  | 62                                                     | 310          | 389          |
| Percentage of specific phenotypes ( <i>n</i> )                    | 45.2% (28)                                             | 78% (242)    | 43% (167)    |
| Percentage of empty eggs ( <i>n</i> )                             | 4.8% (3)                                               | 20% (62)     | 54.2% (211)  |
| Percentage of wild type ( <i>n</i> )                              | 50% (31)                                               | 2% (6)       | 2.8% (11)    |
| Number of phenotypes =100%                                        | 28                                                     | 242          | 167          |
| Percentage of phenotypes classed as medium strength ( <i>n</i> )  | 93% (26)                                               | 97% (236)    | 7.8% (13)    |
| Percentage of phenotypes classed as strong (spheres) ( <i>n</i> ) | 7% (2)                                                 | 3% (6)       | 92.2% (154)  |

<sup>†</sup>This series was the first *fz1/2* RNAi experiment performed by R.P.

**B4. Tc-fz4-RNAi**

|                                                                   | <i>Fz4</i>  | <i>Fz4</i> | <i>Fz4</i>  |
|-------------------------------------------------------------------|-------------|------------|-------------|
| Concentration of dsRNA                                            | 300 ng/μl   | 600 ng/μl  | 1000 ng/μl  |
| Total <i>n</i> analysed cuticles                                  | 115         | 125        | 156         |
| Percentage of specific phenotypes ( <i>n</i> )                    | 0.9% (1)    | 3.2% (4)   | 3.2% (5)    |
| Percentage of empty eggs ( <i>n</i> )                             | 0.9% (1)    | 17.6% (22) | 7% (11)     |
| Percentage of wild type ( <i>n</i> )                              | 98.2% (113) | 79.2% (99) | 89.8% (140) |
| Number of phenotypes =100%                                        | 1           | 4          | 5           |
| Percentage of phenotypes classed as medium strength ( <i>n</i> )  | 100% (1)    | 25% (4)    | 60% (3)     |
| Percentage of phenotypes classed as strong (spheres) ( <i>n</i> ) | –           | 75% (3)    | 40% (2)     |
| Number of app.–/gut–phenotypes ( <i>n</i> ) =100%                 | 1           | 1          | 3           |
| Percentage of app.– only phenotypes ( <i>n</i> )                  | 100% (1)    | 100% (1)   | 100% (3)    |

**B5. Fz1/4-double RNAi**

|                                                                   | <i>fz1/4</i> | <i>fz1/4</i> | <i>fz1/4</i> | <i>fz1/4</i> |
|-------------------------------------------------------------------|--------------|--------------|--------------|--------------|
| Concentration of dsRNA                                            | 300 ng/μl    | 650 ng/μl    | 650 ng/μl    | 1000 ng/μl   |
| Total <i>n</i> analysed cuticles                                  | 180          | 245          | 257          | 261          |
| Percentage of specific phenotypes ( <i>n</i> )                    | 66.1% (119)  | 78% (191)    | 82% (210)    | 7% (18)      |
| Percentage of empty eggs ( <i>n</i> )                             | 0.6% (1)     | 21.6% (53)   | 14% (37)     | 11.5% (30)   |
| Percentage of wild type ( <i>n</i> )                              | 33.3% (60)   | 0.4% (1)     | 4% (10)      | 81.5% (213)  |
| Number of phenotypes =100%                                        | 119          | 191          | 210          | 18           |
| Percentage of phenotypes classed as medium strength ( <i>n</i> )  | 100% (119)   | 97% (185)    | 98.5% (207)  | 100% (18)    |
| Percentage of phenotypes classed as strong (spheres) ( <i>n</i> ) | –            | 3% (6)       | 1.5% (3)     | –            |
| Number of app.–/gut–phenotypes ( <i>n</i> ) =100%                 | 119          | 185          | 207          | 18           |
| Percentage of app.– only phenotypes ( <i>n</i> )                  | 56.3% (67)   | –            | –            | –            |
| Percentage of app. and gut phenotypes ( <i>n</i> )                | 43.7% (52)   | 100% (185)   | 100% (207)   | 100% (18)    |

**B6. Tc-arrow RNAi**

|                                                                   | 10 ng/μl    | 50 ng/μl    | 100 ng/μl   | 300 ng/μl   | 600 ng/μl   | 600 ng/μl   | 1700 ng/μl  |
|-------------------------------------------------------------------|-------------|-------------|-------------|-------------|-------------|-------------|-------------|
| Concentration of dsRNA                                            | 10 ng/μl    | 50 ng/μl    | 100 ng/μl   | 300 ng/μl   | 600 ng/μl   | 600 ng/μl   | 1700 ng/μl  |
| Total <i>n</i>                                                    | 796         | 720         | 601         | 565         | 337         | 164         | 107         |
| Percentage of specific phenotypes ( <i>n</i> )                    | 9.8% (78)   | 17.8% (128) | 7.3% (44)   | 7.5% (43)   | 11.6% (39)  | 9.1% (15)   | –           |
| Percentage of empty eggs ( <i>n</i> )                             | 43.2% (344) | 80% (576)   | 78.9% (474) | 86.9% (491) | 86.6% (292) | 90.8% (149) | 98.1% (105) |
| Percentage of wild type ( <i>n</i> )                              | 47% (374)   | 2.2% (16)   | 13.8% (83)  | 5.5% (31)   | 1.8% (6)    | –           | 1.9% (2)    |
| Number of phenotypes =100%                                        | 78          | 128         | 44          | 43          | 39          | 15          | –           |
| Percentage of phenotypes classed as medium strength ( <i>n</i> )  | 53.8% (42)  | 37.5% (48)  | 36.4% (16)  | 30% (13)    | 30.7% (12)  | 26.6% (4)   | –           |
| Percentage of phenotypes classed as strong (spheres) ( <i>n</i> ) | 46.2% (36)  | 62.5% (80)  | 63.6% (28)  | 70% (30)    | 69.3% (27)  | 73.3% (11)  | –           |
